# Supplementary material for: On the relaxation dynamics of a double glass-forming antiferroelectric liquid crystal
Source: Royal Society of Chemistry journal article supplement (doi:10.1039/d0cp06203k), 2021-01-01
Supplement: d0cp06203k1.pdf [file d0cp06203k1.pdf]

1 Supplementary Information

2 **On relaxation dynamics of double glass-forming antiferroelectric liquid**  
3 **crystal**

4

5 *Anna Drzewicz,<sup>\*a</sup> Małgorzata Jasiurkowska-Delaporte,<sup>a</sup> Ewa Juszyńska-Gałzka,<sup>a</sup> Wojciech*  
6 *Zajac,<sup>a</sup> and Przemysław Kula<sup>b</sup>*

7

8 <sup>a</sup>Institute of Nuclear Physics Polish Academy of Sciences, PL-31342 Krakow, Poland

9 <sup>b</sup>Institute of Chemistry, Military University of Technology, Kaliskiego 2, 00-908 Warszawa,  
10 Poland

11

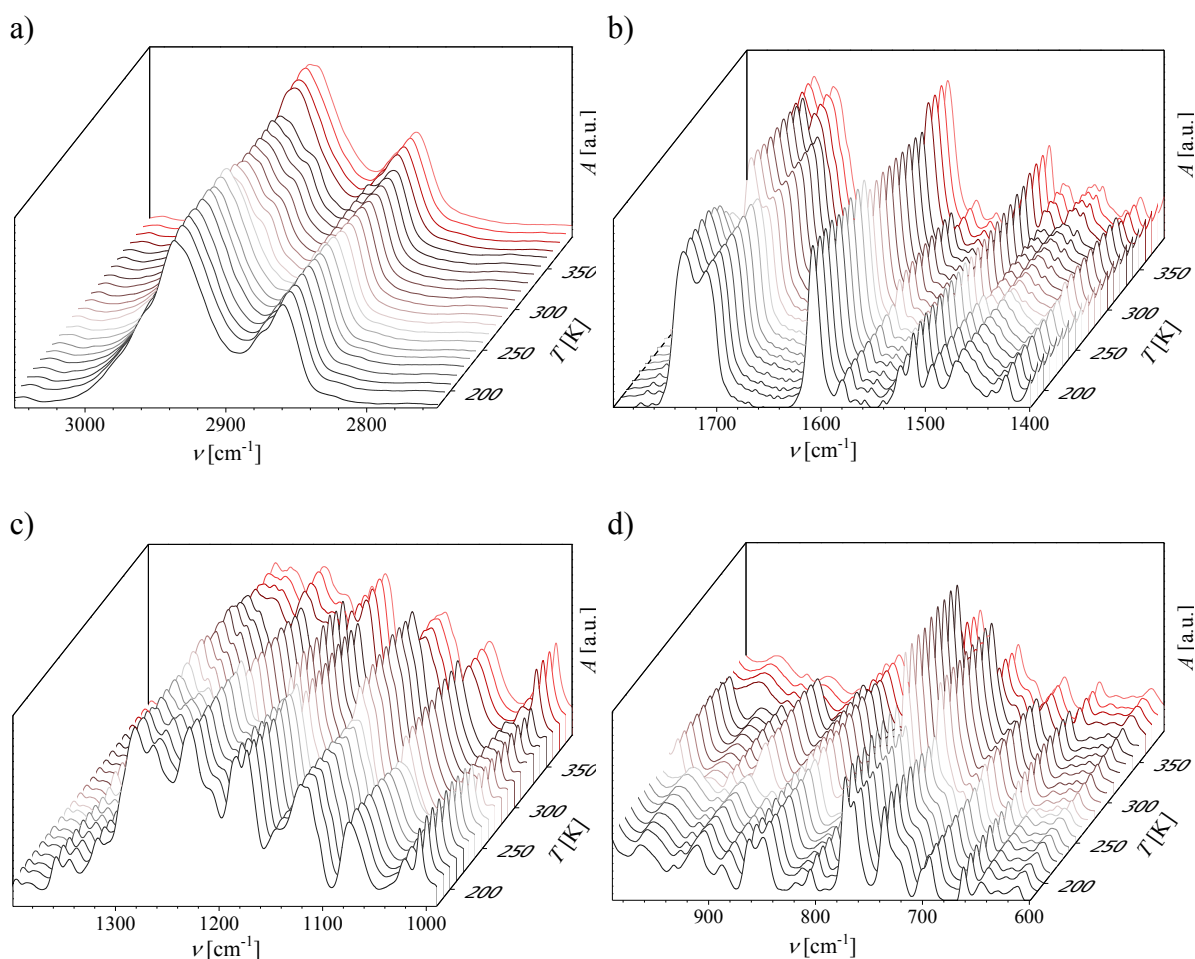

12 **Fig. S1.** Fourier-transform infrared spectra obtained upon heating after fast cooling from 173 to 400 K in the wavenumber  $\nu$   
13 regions of: a) 3050-2750  $\text{cm}^{-1}$ ; b) 1800-1400  $\text{cm}^{-1}$ , c) 1400-1000  $\text{cm}^{-1}$ , d) 1000-600  $\text{cm}^{-1}$ .

Fig. S2. Assignment of vibration modes observed on FTIR spectra for 3F7HPhH7.

| $\nu$ [ $\text{cm}^{-1}$ ] | Assignment                                                                                                                     |
|----------------------------|--------------------------------------------------------------------------------------------------------------------------------|
| 3107                       | $\nu_{\text{Ph}}(\text{C-H})_s$                                                                                                |
| 3038                       | $\nu_{\text{Ph}}(\text{C-H})_{\text{as}}$                                                                                      |
| 3021                       | $\nu(\text{C-H})$ in $\text{C}^*\text{HCH}_3$                                                                                  |
| 2996                       | $\nu(\text{C-H})_{\text{as}}$                                                                                                  |
| 2988                       | $\nu(\text{C-H})_s$                                                                                                            |
| 1777                       | $\nu(\text{C=O})_{\text{core}}$                                                                                                |
| 1751                       | $\nu(\text{C=O})_{\text{chiral}_c}$                                                                                            |
| 1646                       | $\beta_{\text{Ph}}(\text{C-H})_s + \nu(\text{C=O}) + \omega(\text{CH}_2)$                                                      |
| 1557                       | $\beta_{\text{Ph}}(\text{C-H})_{\text{as}} + \nu(\text{C=O}) + \omega(\text{CH}_2)$                                            |
| 1526                       | $\beta_{\text{Ph}}(\text{C-H})_{\text{as}}$                                                                                    |
| 1506                       | $\beta_{\text{Ph}}(\text{C-H})_{\text{as}} + \gamma(\text{CH}_2)$                                                              |
| 1487                       | $\beta_{\text{Ph}}(\text{C-H})_{\text{as}} + \gamma(\text{CH}_2)$                                                              |
| 1486                       | $\gamma(\text{CH}_2)$                                                                                                          |
| 1455                       | $\beta_{\text{Ph}}(\text{C-H})_{\text{as}} + \gamma(\text{CH}_2)$                                                              |
| 1416                       | $\omega(\text{CH}_2) + \omega(\text{CH}_2) + \omega(\text{C}^*\text{HCH}_3)$                                                   |
| 1391                       | $\tau(\text{CH}_2) + \omega(\text{CH}_3) + \omega(\text{C}^*\text{HCH}_3)$                                                     |
| 1366                       | $\beta_{\text{Ph}}(\text{C-H})_{\text{as}} + \omega(\text{CH}_2) + \omega(\text{CH}_3) + \omega(\text{C}^*\text{HCH}_3)$       |
| 1331                       | $\omega(\text{CF}_2) + \omega(\text{CH}_2)$                                                                                    |
| 1329                       | $\beta_{\text{Ph}}(\text{C-H})_{\text{as}} + \omega(\text{CH}_2)$                                                              |
| 1312                       | $\beta_{\text{Ph}}(\text{C-H})_{\text{as}} + \tau(\text{CH}_2)$                                                                |
| 1282                       | $\nu(\text{C-O-C})_{\text{as}} + \tau(\text{CH}_2) + \omega(\text{CF}_2) + \omega(\text{CH}_2)$                                |
| 1272                       | $\nu(\text{C-O-C})_{\text{as}} + \beta_{\text{Ph}}(\text{C-H})_{\text{as}} + \tau(\text{CH}_2) + \tau(\text{C}^*\text{HCH}_3)$ |
| 1248                       | $\nu(\text{C-O-C})_{\text{as}} + \tau(\text{CH}_2) + \omega(\text{CF}_2) + \omega(\text{CH}_2)$                                |
| 1228                       | $\nu(\text{C-F}) + \beta_{\text{Ph}}(\text{C-H})_s + \omega(\text{CH}_2)$                                                      |
| 1163                       | $\nu(\text{C-O-C})_s + \tau(\text{CH}_2) + \omega(\text{CH}_3)$                                                                |
| 1144                       | $\nu(\text{C-O-C})_s + \beta_{\text{Ph}}(\text{C-H})_s$                                                                        |
| 1140                       | $\beta_{\text{Ph}}(\text{C-H})_s + \rho(\text{CH}_3) + \omega(\text{CF}_2)$                                                    |
| 1089                       | $\beta_{\text{Ph}}(\text{C-H})_{\text{as}} + \nu(\text{C-C-O})_s + \omega(\text{CH}_2) + \omega(\text{CH}_3)$                  |
| 1012                       | $\beta_{\text{Ph}}(\text{C-H})_{\text{as}} + \omega(\text{CH}_2) + \omega(\text{CF}_2)$                                        |

15 Abbreviations: as – asymmetric, s – symmetric,  $\nu$  – stretching,  $\beta$  – bending in-plane,  $\gamma$  – bending out-of-plane,  $\rho$  – rocking,

16  $\tau$  – twisting,  $\omega$  – wagging, Ph – in aromatic ring, core – in rigid core, chiral\_c. – in chiral centre.
